# Supplementary material for: A novel PANoptosis-related long non-coding RNA index to predict prognosis, immune microenvironment and personalised treatment in hepatocellular carcinoma
Source: publisher site journal article supplement (doi:10.18632/aging.205488), 2024-01-26
Supplement: Supplementary file [file aging-v16i3-205488-supplementary-material-SD2.pdf]

## SUPPLEMENTARY TABLES

Supplementary Table 1. PANoptosis-related genes.

| PRGs           | Source                                                                                                                                                                                                                                                                                                                           |
|----------------|----------------------------------------------------------------------------------------------------------------------------------------------------------------------------------------------------------------------------------------------------------------------------------------------------------------------------------|
| <i>ADAR</i>    | Karki, R., Sundaram, B., Sharma, B.R., et al. (2021). ADAR1 restricts ZBP1-mediated immune response and PANoptosis to promote tumorigenesis. <i>Cell Rep</i> 37(3), 109858. <a href="https://doi.org/10.1016/j.celrep.2021.109858">https://doi.org/10.1016/j.celrep.2021.109858</a> .                                            |
| <i>AIM2</i>    | Lee, S., Karki, R., Wang, Y., et al. (2021). AIM2 forms a complex with pyrin and ZBP1 to drive PANoptosis and host defence. <i>Nature</i> 597(7876), 415-419. <a href="https://doi.org/10.1038/s41586-021-03875-8">https://doi.org/10.1038/s41586-021-03875-8</a> .                                                              |
| <i>CASP1</i>   | Zheng, M., Karki, R., Vogel, P., et al. (2020). Caspase-6 Is a Key Regulator of Innate Immunity, Inflammasome Activation, and Host Defense. <i>Cell</i> 181(3), 674-687.e613. <a href="https://doi.org/10.1016/j.cell.2020.03.040">https://doi.org/10.1016/j.cell.2020.03.040</a> .                                              |
| <i>CASP4</i>   | Christgen, S., Zheng, M., Kesavardhana, S., et al. (2020). Identification of the PANoptosome: A Molecular Platform Triggering Pyroptosis, Apoptosis, and Necroptosis (PANoptosis). <i>Front Cell Infect Microbiol</i> 10, 237. <a href="https://doi.org/10.3389/fcimb.2020.00237">https://doi.org/10.3389/fcimb.2020.00237</a> . |
| <i>CASP3</i>   | Zheng, M., Karki, R., Vogel, P., et al. (2020). Caspase-6 Is a Key Regulator of Innate Immunity, Inflammasome Activation, and Host Defense. <i>Cell</i> 181(3), 674-687.e613. <a href="https://doi.org/10.1016/j.cell.2020.03.040">https://doi.org/10.1016/j.cell.2020.03.040</a> .                                              |
| <i>CASP6</i>   | Zheng, M., Karki, R., Vogel, P., et al. (2020). Caspase-6 Is a Key Regulator of Innate Immunity, Inflammasome Activation, and Host Defense. <i>Cell</i> 181(3), 674-687.e613. <a href="https://doi.org/10.1016/j.cell.2020.03.040">https://doi.org/10.1016/j.cell.2020.03.040</a> .                                              |
| <i>CASP8</i>   | Malireddi, R.K.S., Kesavardhana, S., and Kanneganti, T.D. (2019). ZBP1 and TAK1: Master Regulators of NLRP3 Inflammasome/Pyroptosis, Apoptosis, and Necroptosis (PAN-optosis). <i>Front Cell Infect Microbiol</i> 9, 406. <a href="https://doi.org/10.3389/fcimb.2019.00406">https://doi.org/10.3389/fcimb.2019.00406</a> .      |
| <i>FADD</i>    | Malireddi, R.K.S., Kesavardhana, S., and Kanneganti, T.D. (2019). ZBP1 and TAK1: Master Regulators of NLRP3 Inflammasome/Pyroptosis, Apoptosis, and Necroptosis (PAN-optosis). <i>Front Cell Infect Microbiol</i> 9, 406. <a href="https://doi.org/10.3389/fcimb.2019.00406">https://doi.org/10.3389/fcimb.2019.00406</a> .      |
| <i>GSDMD</i>   | Zheng, M., Karki, R., Vogel, P., et al. (2020). Caspase-6 Is a Key Regulator of Innate Immunity, Inflammasome Activation, and Host Defense. <i>Cell</i> 181(3), 674-687.e613. <a href="https://doi.org/10.1016/j.cell.2020.03.040">https://doi.org/10.1016/j.cell.2020.03.040</a> .                                              |
| <i>GSDME</i>   | Liu, J., Hong, M., Li, Y., et al. (2022). Programmed Cell Death Tunes Tumor Immunity. <i>Front Immunol</i> 13, 847345. <a href="https://doi.org/10.3389/fimmu.2022.847345">https://doi.org/10.3389/fimmu.2022.847345</a> .                                                                                                       |
| <i>IRF1</i>    | Karki, R., Sharma, B.R., Lee, E., et al. (2020). Interferon regulatory factor 1 regulates PANoptosis to prevent colorectal cancer. <i>JCI Insight</i> 5(12). <a href="https://doi.org/10.1172/jci.insight.136720">https://doi.org/10.1172/jci.insight.136720</a> .                                                               |
| <i>MAP3K7</i>  | Samir, P., Malireddi, R.K.S., and Kanneganti, T.D. (2020). The PANoptosome: A Deadly Protein Complex Driving Pyroptosis, Apoptosis, and Necroptosis (PANoptosis). <i>Front Cell Infect Microbiol</i> 10, 238. <a href="https://doi.org/10.3389/fcimb.2020.00238">https://doi.org/10.3389/fcimb.2020.00238</a> .                  |
| <i>MLKL</i>    | Zheng, M., Karki, R., Vogel, P., et al. (2020). Caspase-6 Is a Key Regulator of Innate Immunity, Inflammasome Activation, and Host Defense. <i>Cell</i> 181(3), 674-687.e613. <a href="https://doi.org/10.1016/j.cell.2020.03.040">https://doi.org/10.1016/j.cell.2020.03.040</a> .                                              |
| <i>NFS1</i>    | Lin, J.F., Hu, P.S., Wang, Y.Y., et al. (2022). Phosphorylated NFS1 weakens oxaliplatin-based chemosensitivity of colorectal cancer by preventing PANoptosis. <i>Signal Transduct Target Ther</i> 7(1), 54. <a href="https://doi.org/10.1038/s41392-022-00889-0">https://doi.org/10.1038/s41392-022-00889-0</a> .                |
| <i>NLRC4</i>   | Sundaram, B., and Kanneganti, T.D. (2021). Advances in Understanding Activation and Function of the NLRC4 Inflammasome. <i>Int J Mol Sci</i> 22(3). <a href="https://doi.org/10.3390/ijms22031048">https://doi.org/10.3390/ijms22031048</a> .                                                                                    |
| <i>NLRP3</i>   | Zheng, M., Karki, R., Vogel, P., et al. (2020). Caspase-6 Is a Key Regulator of Innate Immunity, Inflammasome Activation, and Host Defense. <i>Cell</i> 181(3), 674-687.e613. <a href="https://doi.org/10.1016/j.cell.2020.03.040">https://doi.org/10.1016/j.cell.2020.03.040</a> .                                              |
| <i>PSTPIP2</i> | Samir, P., Malireddi, R.K.S., and Kanneganti, T.D. (2020). The PANoptosome: A Deadly Protein Complex Driving Pyroptosis, Apoptosis, and Necroptosis (PANoptosis). <i>Front Cell Infect Microbiol</i> 10, 238. <a href="https://doi.org/10.3389/fcimb.2020.00238">https://doi.org/10.3389/fcimb.2020.00238</a> .                  |

|                |                                                                                                                                                                                                                                                                                                                             |
|----------------|-----------------------------------------------------------------------------------------------------------------------------------------------------------------------------------------------------------------------------------------------------------------------------------------------------------------------------|
| <b>PYCARD</b>  | Zheng, M., Karki, R., Vogel, P., et al. (2020). Caspase-6 Is a Key Regulator of Innate Immunity, Inflammasome Activation, and Host Defense. <i>Cell</i> 181(3), 674-687.e613. <a href="https://doi.org/10.1016/j.cell.2020.03.040">https://doi.org/10.1016/j.cell.2020.03.040</a> .                                         |
| <b>RBCK1</b>   | Samir, P., Malireddi, R.K.S., and Kanneganti, T.D. (2020). The PANoptosome: A Deadly Protein Complex Driving Pyroptosis, Apoptosis, and Necroptosis (PANoptosis). <i>Front Cell Infect Microbiol</i> 10, 238. <a href="https://doi.org/10.3389/fcimb.2020.00238">https://doi.org/10.3389/fcimb.2020.00238</a> .             |
| <b>RIPK1</b>   | Malireddi, R.K.S., Kesavardhana, S., and Kanneganti, T.D. (2019). ZBP1 and TAK1: Master Regulators of NLRP3 Inflammasome/Pyroptosis, Apoptosis, and Necroptosis (PAN-optosis). <i>Front Cell Infect Microbiol</i> 9, 406. <a href="https://doi.org/10.3389/fcimb.2019.00406">https://doi.org/10.3389/fcimb.2019.00406</a> . |
| <b>RIPK3</b>   | Malireddi, R.K.S., Kesavardhana, S., and Kanneganti, T.D. (2019). ZBP1 and TAK1: Master Regulators of NLRP3 Inflammasome/Pyroptosis, Apoptosis, and Necroptosis (PAN-optosis). <i>Front Cell Infect Microbiol</i> 9, 406. <a href="https://doi.org/10.3389/fcimb.2019.00406">https://doi.org/10.3389/fcimb.2019.00406</a> . |
| <b>RNF31</b>   | Samir, P., Malireddi, R.K.S., and Kanneganti, T.D. (2020). The PANoptosome: A Deadly Protein Complex Driving Pyroptosis, Apoptosis, and Necroptosis (PANoptosis). <i>Front Cell Infect Microbiol</i> 10, 238. <a href="https://doi.org/10.3389/fcimb.2020.00238">https://doi.org/10.3389/fcimb.2020.00238</a> .             |
| <b>TNFAIP3</b> | Samir, P., Malireddi, R.K.S., and Kanneganti, T.D. (2020). The PANoptosome: A Deadly Protein Complex Driving Pyroptosis, Apoptosis, and Necroptosis (PANoptosis). <i>Front Cell Infect Microbiol</i> 10, 238. <a href="https://doi.org/10.3389/fcimb.2020.00238">https://doi.org/10.3389/fcimb.2020.00238</a> .             |
| <b>ZBP1</b>    | Malireddi, R.K.S., Kesavardhana, S., and Kanneganti, T.D. (2019). ZBP1 and TAK1: Master Regulators of NLRP3 Inflammasome/Pyroptosis, Apoptosis, and Necroptosis (PAN-optosis). <i>Front Cell Infect Microbiol</i> 9, 406. <a href="https://doi.org/10.3389/fcimb.2019.00406">https://doi.org/10.3389/fcimb.2019.00406</a> . |

**Supplementary Table 2. Primers and siRNA target sequences.**

| Name                      | Sequences                                                                                                                                                                                                                                                              |
|---------------------------|------------------------------------------------------------------------------------------------------------------------------------------------------------------------------------------------------------------------------------------------------------------------|
| Primers for real-time PCR | Primer:<br>Forward primer CTCCTTCCCACAAGAGCCAC<br>Reverse primer ACTCACTCCGACTGACCTGT                                                                                                                                                                                  |
| The target sites of siRNA | Si-1:<br>target sequence: atggaactggccaacattaaaa<br>guide (5'→3')UUAAUGUUGGCCAGUUUCCAU<br>passenger (5'→3)GGAAACUGGCCAACAUUAAAA<br><br>Si-2:<br>target sequence: cagattaggaaggatgctaaca<br>guide (5'→3')UUUAGCAUCCUCCUAAUCUG<br>passenger (5'→')GAUUAGGAAGGAUGC UAAACA |
